# Supplementary material
Source: PubMed Central journal article supplement (PMC2633403)

**Supplemental Figure 1.** Regulation of SIRT2 expression in brown adipose tissue by fasting. Sixteen weeks old C57BL/6 male mice were deprived of food at the onset of dark cycle (6:00pm). Twenty-four hours later, mice were re-fed for three hours. Total RNA were extracted from brown adipose, and examined by Northern blot analysis for SIRT2 expression.

**Supplemental Figure 2.** Adipocyte differentiation of 3T3-L1 cells with SIRT2 knock down or over expression. A. 3T3-L1 Cells with SIRT2 shRNA knock-down were differentiated as described by Jing et al (Jing *et al.*, 2007). B. 3T3-L1 cells with retroviral expression of SIRT2 or SIRT2-N168A mutant were differentiated as described by Jing et al (Jing *et al.*, 2007), with or without treatment of 1 $\mu$ m rosiglitazone.

**Supplemental Figure 3.** Sub-cellular distribution of FOXO1 and PPAR $\gamma$ . HEK293T cells were transfected with FOXO1, PPAR $\gamma$  and SIRT2 or SIRT2-N168A (SIRT2NA). Twenty-four hours after transfection, cells were treated with TSA (1 $\mu$ M) for 2 hours. After the cells were fractionated into cytoplasmic and nuclear fractions, sub-cellular distributions of FOXO1, PPAR $\gamma$  and SIRT2 were detected by Western blotting. GAPDH and Lamin A/C were examined as markers for sub-cellular fractionation efficiency.

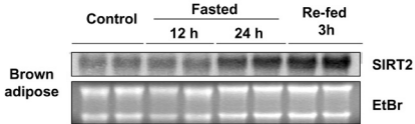

**A**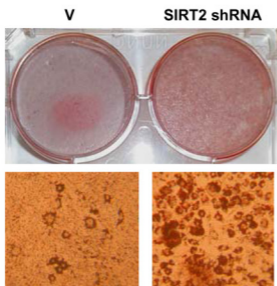**B**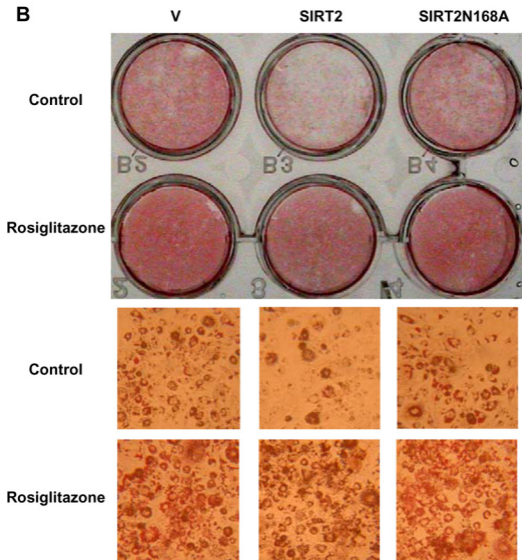

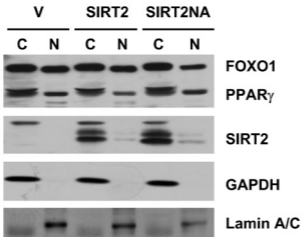

Supplement: E08-06-0647_1.pdf [file E08-06-0647_1.pdf]
